# Supplementary material
Source: MDPI journal article supplement (https://www.mdpi.com/2624-8921/2/3/28)
Supplement: s1 [file s1]

## Supplementary Materials

**Table S1.** Detailed information of media sources used in this study.

| Name                              | Website                                                                               | Media Type                   |
|-----------------------------------|---------------------------------------------------------------------------------------|------------------------------|
| Capital West News                 | <a href="https://capwestnews.org/">https://capwestnews.org/</a>                       | Digital Native <sup>1</sup>  |
| gephardtdaily.com                 | <a href="http://gephardtdaily.com/">http://gephardtdaily.com/</a>                     | Digital Native               |
| State News - United States - Utah | <a href="http://www.utah.statenews.net/">http://www.utah.statenews.net/</a>           | Digital Native               |
| stgeorgeutah.com                  | <a href="http://www.stgeorgeutah.com/#spider">http://www.stgeorgeutah.com/#spider</a> | Digital Native               |
| cityweekly.net                    | <a href="http://cityweekly.net/">http://cityweekly.net/</a>                           | Print Native <sup>2</sup>    |
| dailyutahchronicle.com            | <a href="http://dailyutahchronicle.com/">http://dailyutahchronicle.com/</a>           | Print Native                 |
| Deseret News                      | <a href="http://www.deseretnews.com">http://www.deseretnews.com</a>                   | Print Native                 |
| Globe - United States - Utah      | <a href="http://www.globeslcc.com/">http://www.globeslcc.com/</a>                     | Print Native                 |
| Insider - United States           | <a href="http://www.insiderutah.com/">http://www.insiderutah.com/</a>                 | Print Native                 |
| Leader - United States - Utah     | <a href="http://www.tremontonleader.com/">http://www.tremontonleader.com/</a>         | Print Native                 |
| moabsunnews.com                   | <a href="http://moabsunnews.com/">http://moabsunnews.com/</a>                         | Print Native                 |
| moabtimes.com                     | <a href="http://moabtimes.com/">http://moabtimes.com/</a>                             | Print Native                 |
| morgannews.com                    | <a href="http://morgannews.com/">http://morgannews.com/</a>                           | Print Native                 |
| Now Salt Lake                     | <a href="http://www.sltrib.com/entertainment">http://www.sltrib.com/entertainment</a> | Print Native                 |
| parkrecord.com                    | <a href="http://parkrecord.com/">http://parkrecord.com/</a>                           | Print Native                 |
| qsaltlake.com                     | <a href="http://qsaltlake.com">http://qsaltlake.com</a>                               | Print Native                 |
| saltlakemagazine.com              | <a href="http://saltlakemagazine.com/">http://saltlakemagazine.com/</a>               | Print Native                 |
| Sanpete Messenger                 | <a href="http://sanpetemessenger.com/">http://sanpetemessenger.com/</a>               | Print Native                 |
| Signpost - United States          | <a href="http://signpost.mywebermedia.com/">http://signpost.mywebermedia.com/</a>     | Print Native                 |
| suindependent.com                 | <a href="http://suindependent.com/">http://suindependent.com/</a>                     | Print Native                 |
| SUUNews                           | <a href="https://suunews.net/">https://suunews.net/</a>                               | Print Native                 |
| The Salt Lake Tribune             | <a href="http://www.sltrib.com/">http://www.sltrib.com/</a>                           | Print Native                 |
| thespectrum.com                   | <a href="http://www.thespectrum.com#spider">http://www.thespectrum.com#spider</a>     | Print Native                 |
| Tooele Transcript Bulletin        | <a href="http://tooeleonline.com/">http://tooeleonline.com/</a>                       | Print Native                 |
| universe.byu.edu                  | <a href="http://universe.byu.edu/">http://universe.byu.edu/</a>                       | Print Native                 |
| usustatesman.com                  | <a href="http://usustatesman.com/">http://usustatesman.com/</a>                       | Print Native                 |
| Utah Business                     | <a href="https://utahbusiness.com/">https://utahbusiness.com/</a>                     | Print Native                 |
| UVU Review                        | <a href="http://www.uvureview.com/">http://www.uvureview.com/</a>                     | Print Native                 |
| cachevalleydaily.com              | <a href="http://cachevalleydaily.com/">http://cachevalleydaily.com/</a>               | Video Broadcast <sup>3</sup> |
| ETV News                          | <a href="http://etv10news.com/">http://etv10news.com/</a>                             | Video Broadcast              |
| fox13now.com                      | <a href="http://www.fox13now.com">http://www.fox13now.com</a>                         | Video Broadcast              |
| good4utah.com                     | <a href="http://good4utah.com/">http://good4utah.com/</a>                             | Video Broadcast              |
| kcpw.org                          | <a href="http://kcpw.org/">http://kcpw.org/</a>                                       | Video Broadcast              |
| KDXU                              | <a href="http://890kdxu.com/">http://890kdxu.com/</a>                                 | Video Broadcast              |
| KLO                               | <a href="http://www.kloradio.com/">http://www.kloradio.com/</a>                       | Video Broadcast              |
| KOAL                              | <a href="http://www.castlecountrysradio.com/">http://www.castlecountrysradio.com/</a> | Video Broadcast              |
| ksl.com                           | <a href="http://www.ksl.com/#spider">http://www.ksl.com/#spider</a>                   | Video Broadcast              |
| kuer.org                          | <a href="http://kuer.org/">http://kuer.org/</a>                                       | Video Broadcast              |
| kutv.com                          | <a href="http://www.kutv.com/#spider">http://www.kutv.com/#spider</a>                 | Video Broadcast              |
| upr.org                           | <a href="http://upr.org/">http://upr.org/</a>                                         | Video Broadcast              |

<sup>1</sup> Digital Native: This source is internet-based. Use this for news sources that began on the internet first, organizational websites, and blogs. Examples: CDC, Vox, Scroll.in. <sup>2</sup> Print Native: This source is primarily a print publication. Use this for newspapers and magazines. Examples: *New York Times*, *The Economist*. <sup>3</sup> Video Broadcast: This source is primarily a broadcast TV station (i.e., video transcriptions or closed captions). Examples: CNN, Fox News.

**Table S2.** Total and annual average Air Quality Index days in the study period. State and Federal Holidays, in addition to holiday-influenced time periods (i.e., between Christmas week and the first week of the year), were not included in the analysis due to irregular transit travel patterns.

| Study Period<br>Category | Green AQI<br>Days | Yellow AQI<br>Days | Orange AQI<br>Days | Red AQI<br>Days | Average Annual<br>Study Days |
|--------------------------|-------------------|--------------------|--------------------|-----------------|------------------------------|
| Annual                   | 560               | 406                | 62                 | 5               | 344                          |
| Winter                   | 140               | 68                 | 23                 | 4               | 78                           |
| Spring                   | 138               | 133                | 1                  | 1               | 91                           |
| Summer                   | 72                | 157                | 38                 | 0               | 89                           |
| Fall                     | 210               | 48                 | 0                  | 0               | 86                           |
| January                  | 27                | 38                 | 18                 | 1               | 28                           |
| February                 | 66                | 7                  | 5                  | 3               | 27                           |
| March                    | 81                | 12                 | 0                  | 0               | 31                           |
| April                    | 34                | 54                 | 1                  | 1               | 30                           |
| May                      | 23                | 67                 | 0                  | 0               | 30                           |
| June                     | 19                | 47                 | 24                 | 0               | 30                           |
| July                     | 22                | 57                 | 5                  | 0               | 28                           |
| August                   | 31                | 53                 | 9                  | 0               | 31                           |
| September                | 64                | 23                 | 0                  | 0               | 29                           |
| October                  | 88                | 5                  | 0                  | 0               | 31                           |
| November                 | 58                | 20                 | 0                  | 0               | 26                           |
| December                 | 47                | 23                 | 0                  | 0               | 23                           |

<sup>1</sup> Digital Native: This source is internet-based. Use this for news sources that began on the internet first, organizational websites, and blogs. Examples: CDC, Vox, Scroll.in. <sup>2</sup> Print Native: This source is primarily a print publication. Use this for newspapers and magazines. Examples: *New York Times*, *The Economist*. <sup>3</sup> Video Broadcast: This source is primarily a broadcast TV station (i.e., video transcriptions or closed captions). Examples: CNN, Fox News.
